# Supplementary material for: New Benzoxazine Secondary Metabolites from an Arctic Actinomycete
Source: MDPI journal article supplement (doi:10.3390/md12052526), 2014-04-30

## Supplementary Information

**Figure S1.**  $^1\text{H}$  NMR spectrum (600 MHz) of Arcticoside (**1**) in  $\text{DMSO-}d_6$ .

**Figure S2.**  $^{13}\text{C}$  NMR spectrum (150 MHz) of Arcticoside (**1**) in  $\text{DMSO-}d_6$ .

**Figure S3.** COSY spectrum (600 MHz) of Arcticoside (**1**) in  $\text{DMSO-}d_6$ .

**Figure S4.** HSQC spectrum (600 MHz) of Arcticoside (**1**) in  $\text{DMSO-}d_6$ .

**Figure S5.** HMBC spectrum (600 MHz) of Arcticoside (**1**) in  $\text{DMSO-}d_6$ .

**Figure S6.** TOCSY spectrum (600 MHz) of Arcticoside (**1**) in  $\text{DMSO-}d_6$ .

**Figure S7.** ROESY spectrum (600 MHz) of Arcticoside (**1**) in  $\text{DMSO-}d_6$ .

**Figure S8.**  $^1\text{H}$  NMR spectrum (600 MHz) of C-1027 Chr-V (**2**) in  $\text{DMSO-}d_6$ .

**Figure S9.**  $^{13}\text{C}$  NMR spectrum (150 MHz) of C-1027 Chr-V (**2**) in  $\text{DMSO-}d_6$ .

**Figure S10.** COSY spectrum (600 MHz) of C-1027 Chr-V (**2**) in  $\text{DMSO-}d_6$ .

**Figure S11.** HSQC spectrum (600 MHz) of C-1027 Chr-V (**2**) in  $\text{DMSO-}d_6$ .

**Figure S12.** HMBC spectrum (600 MHz) of C-1027 Chr-V (**2**) in  $\text{DMSO-}d_6$ .

**Figure S13.** ROESY spectrum (600 MHz) of C-1027 Chr-V (**2**) in  $\text{DMSO-}d_6$ .

**Figure S14.** 16S rDNA sequence data of *Streptomyces* sp. ART 5.

**Figure S15.** (a) The GC chromatograms of the silylated arcticoside sugar. (b) Co-injection of the silylated D-glucose standard and the silylated arcticoside sugar. D-Glucose and the arcticoside sugar eluted at the same retention time. (c) Co-injection of the silylated L-glucose standard and the silylated arcticoside sugar. L-Glucose and the arcticoside sugar were separated.

**Figure S1.**  $^1\text{H}$  NMR spectrum (600 MHz) of Arcticoside (**1**) in  $\text{DMSO-}d_6$ .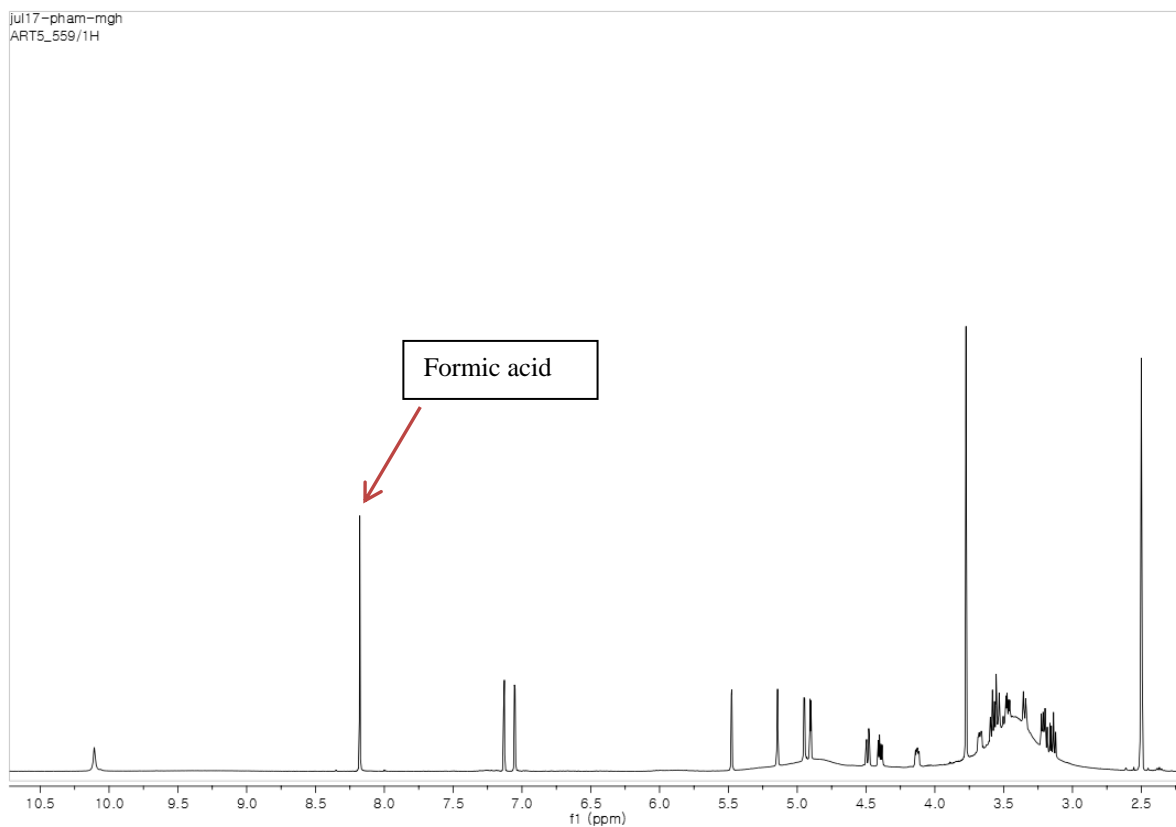**Figure S2.**  $^{13}\text{C}$  NMR spectrum (150 MHz) of Arcticoside (**1**) in  $\text{DMSO-}d_6$ .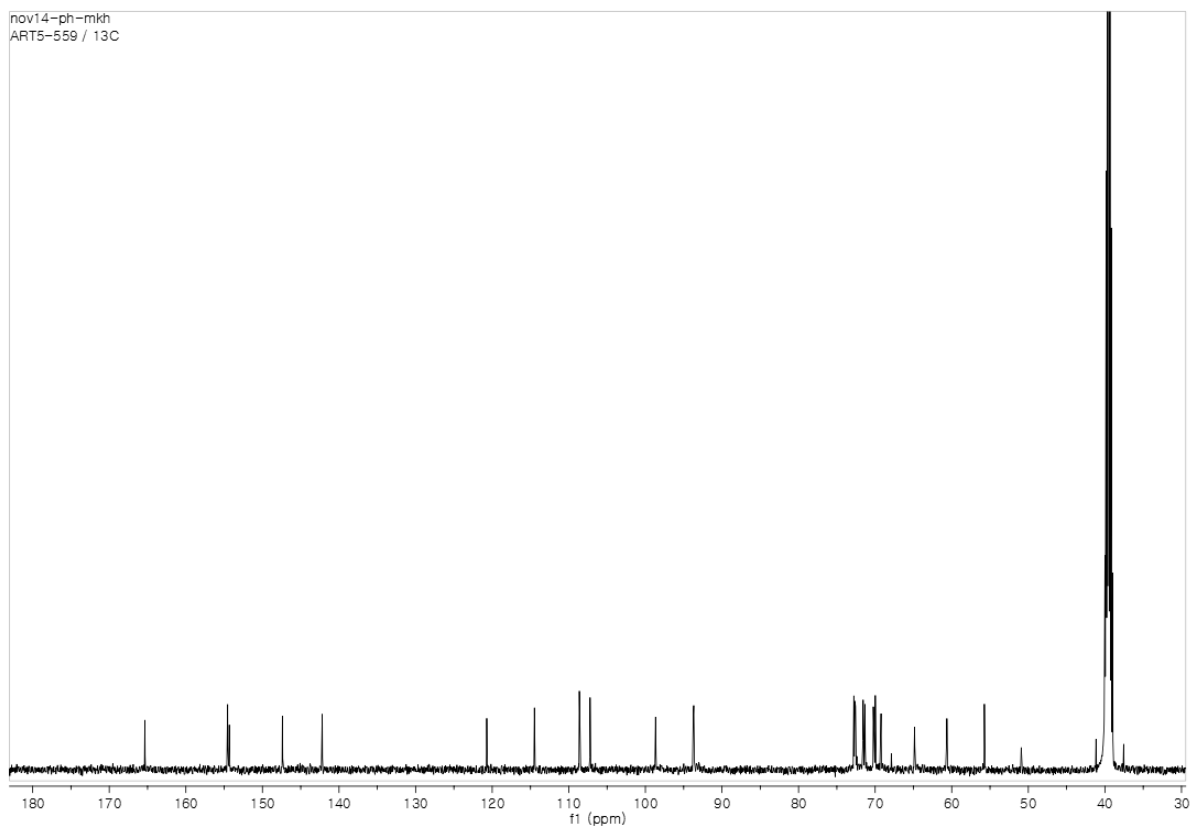

**Figure S3.** COSY spectrum (600 MHz) of Arcticoside (1) in DMSO- $d_6$ .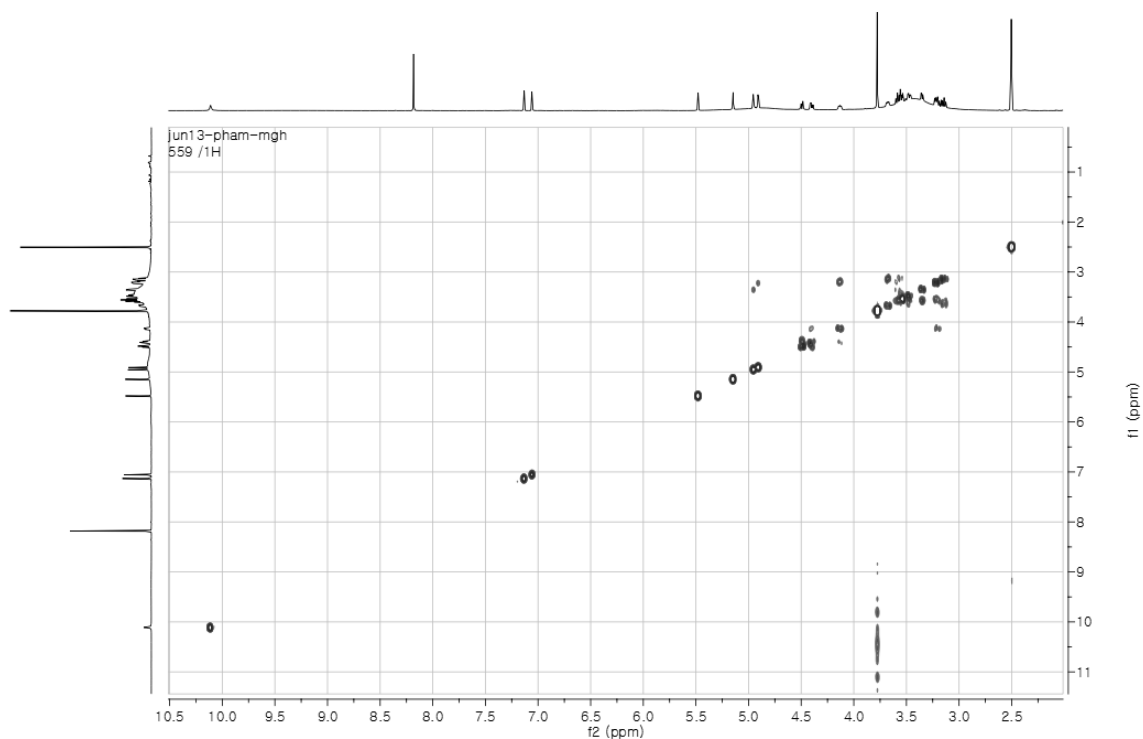**Figure S4.** HSQC spectrum (600 MHz) of Arcticoside (1) in DMSO- $d_6$ .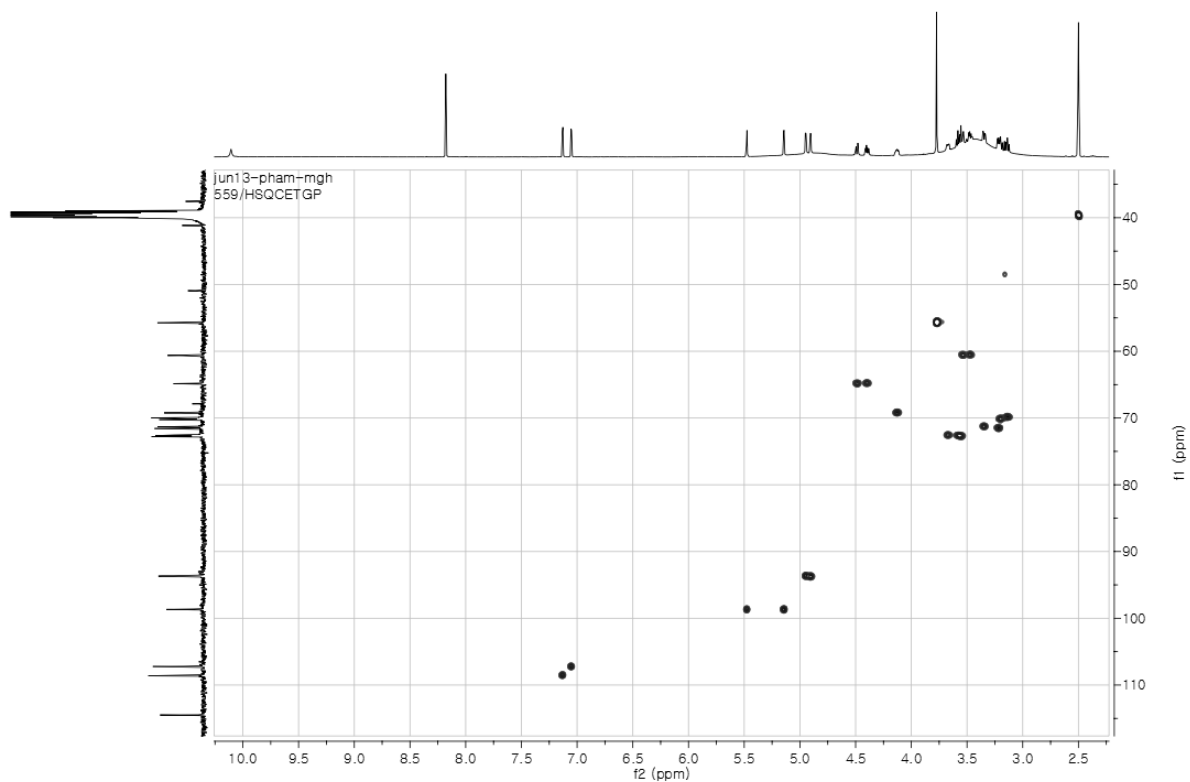

**Figure S5.** HMBC spectrum (600 MHz) of Arcticoside (1) in DMSO- $d_6$ .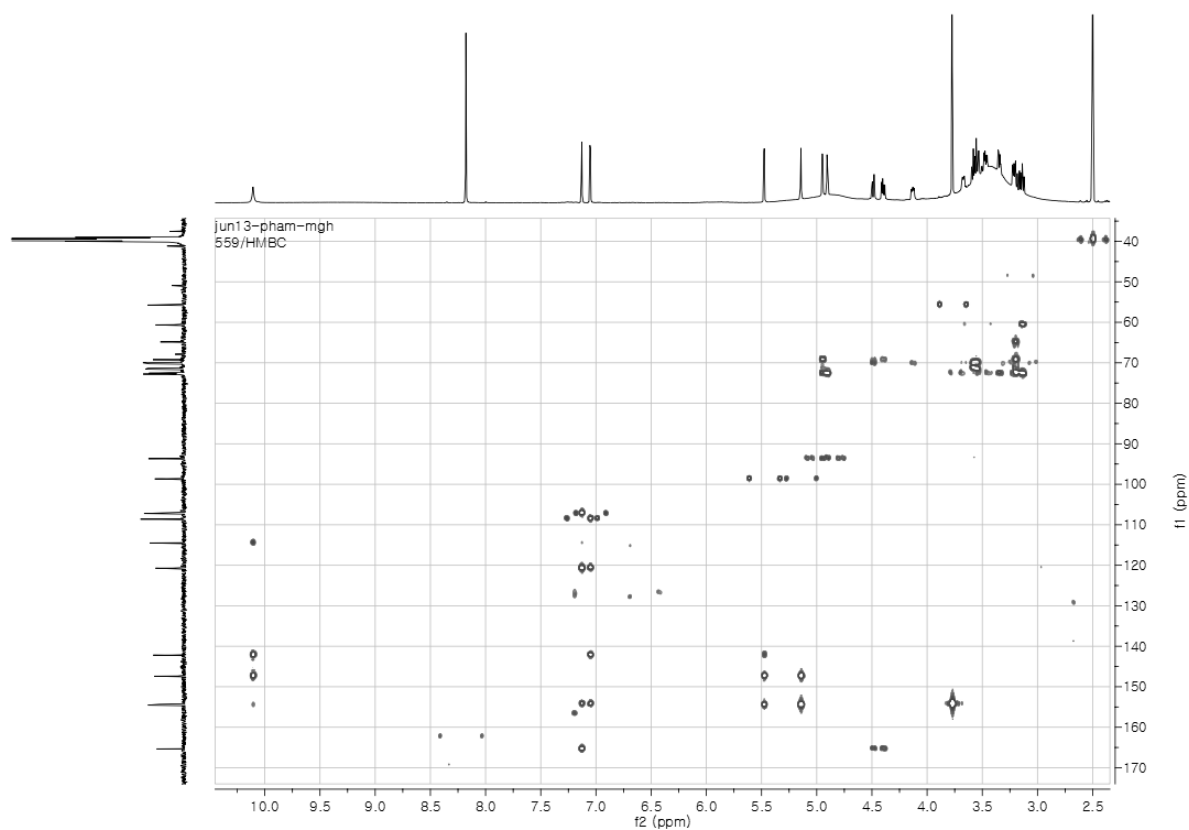**Figure S6.** TOCSY spectrum (600 MHz) of Arcticoside (1) in DMSO- $d_6$ .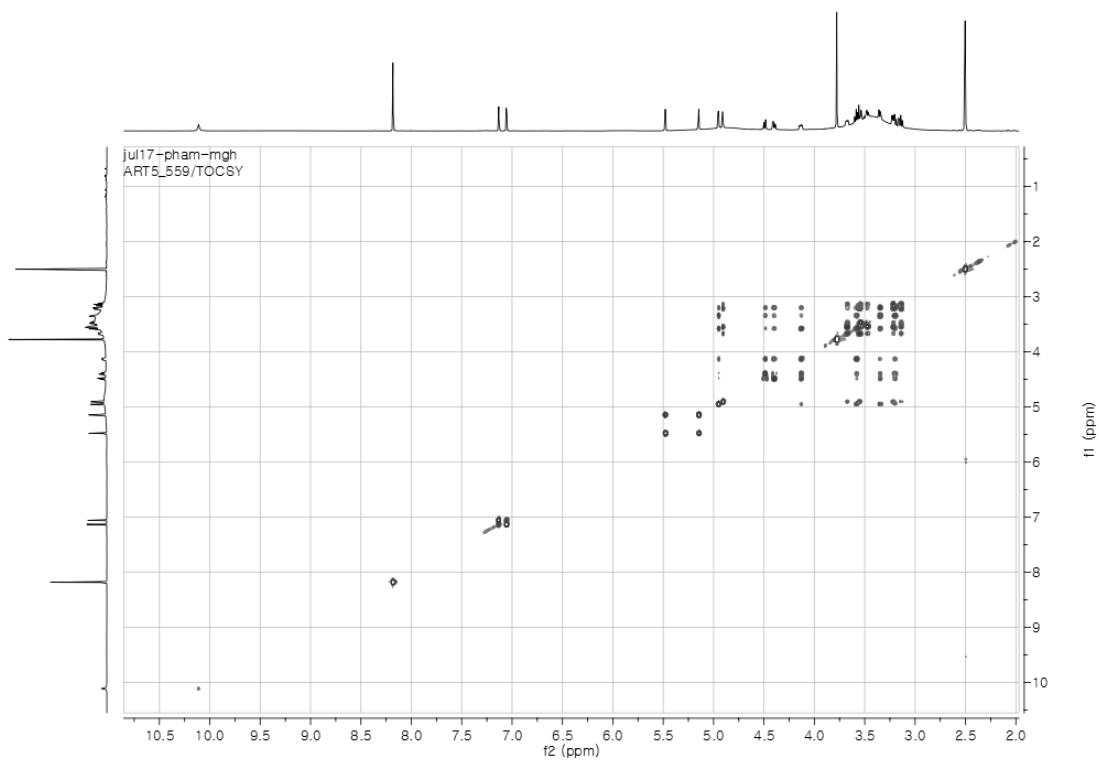

**Figure S7.** ROESY spectrum (600 MHz) of Arcticoside (1) in DMSO- $d_6$ .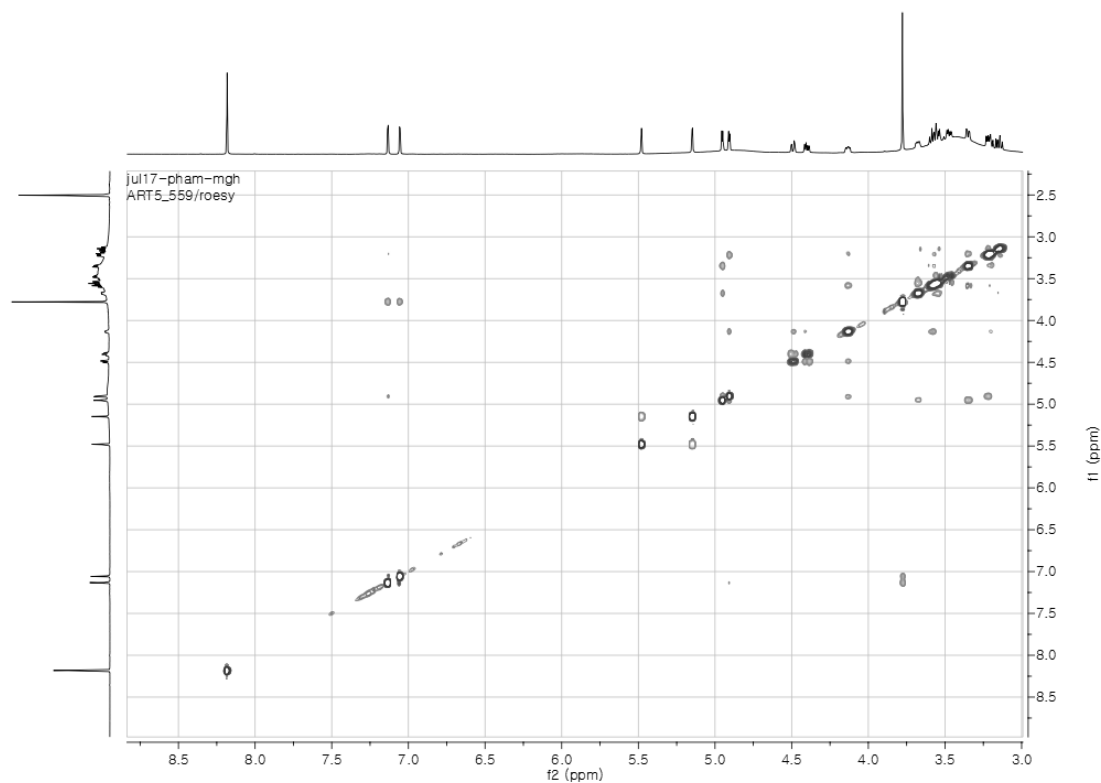**Figure S8.**  $^1\text{H}$  NMR spectrum (600 MHz) of C-1027 Chr-V (2) in DMSO- $d_6$ .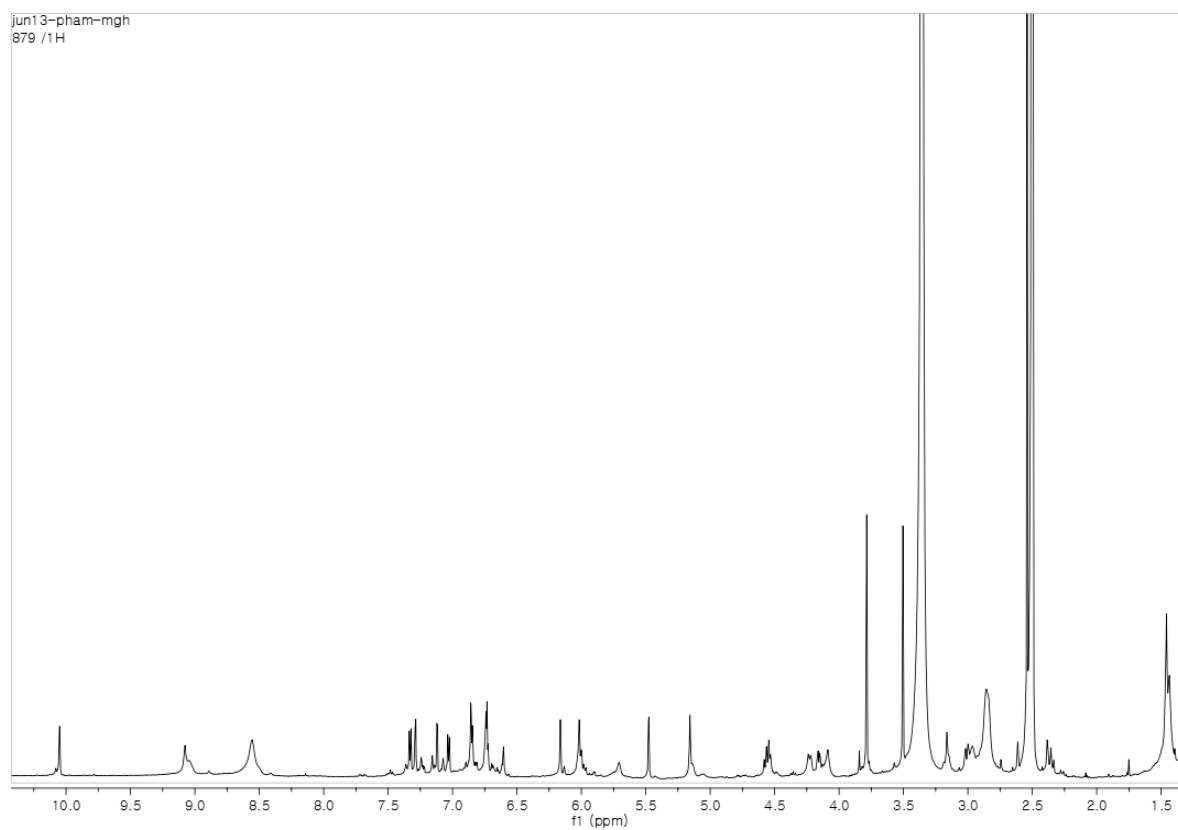

**Figure S9.**  $^{13}\text{C}$  NMR spectrum (150 MHz) of C-1027 Chr-V (2) in  $\text{DMSO-}d_6$ .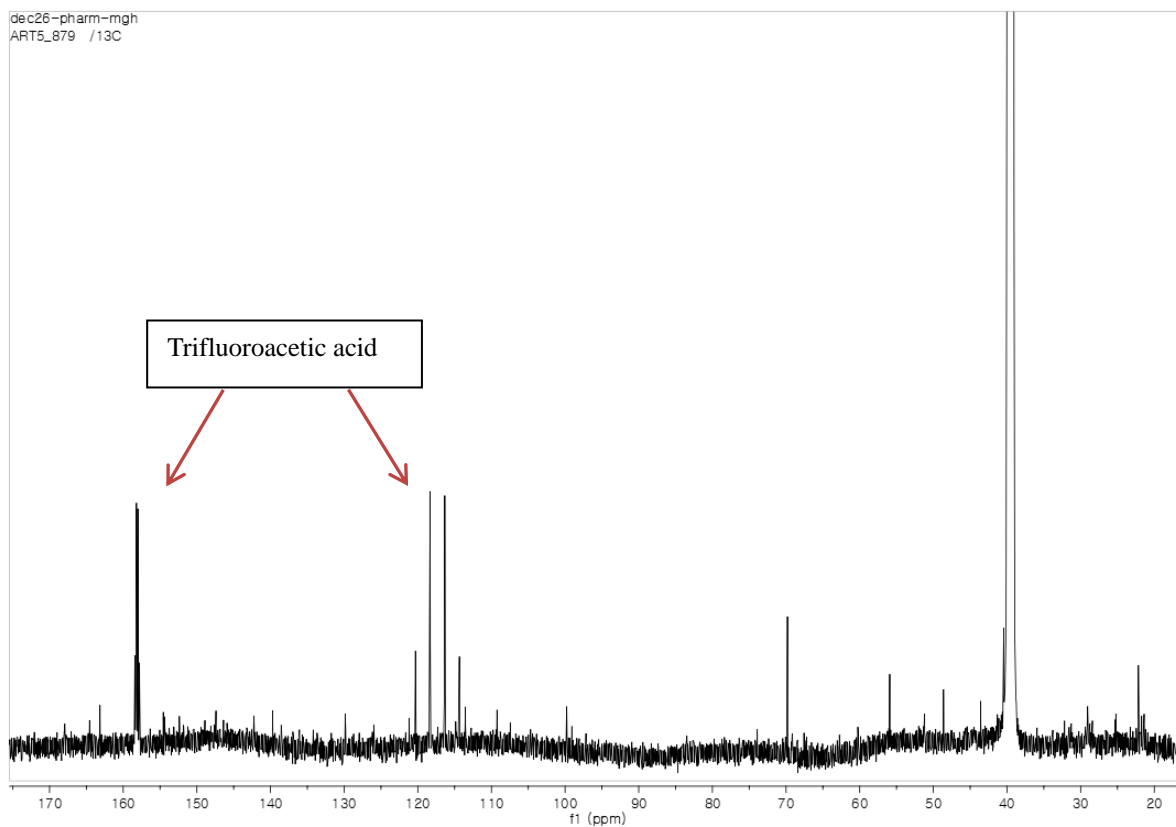**Figure S10.** COSY spectrum (600 MHz) of C-1027 Chr-V (2) in  $\text{DMSO-}d_6$ .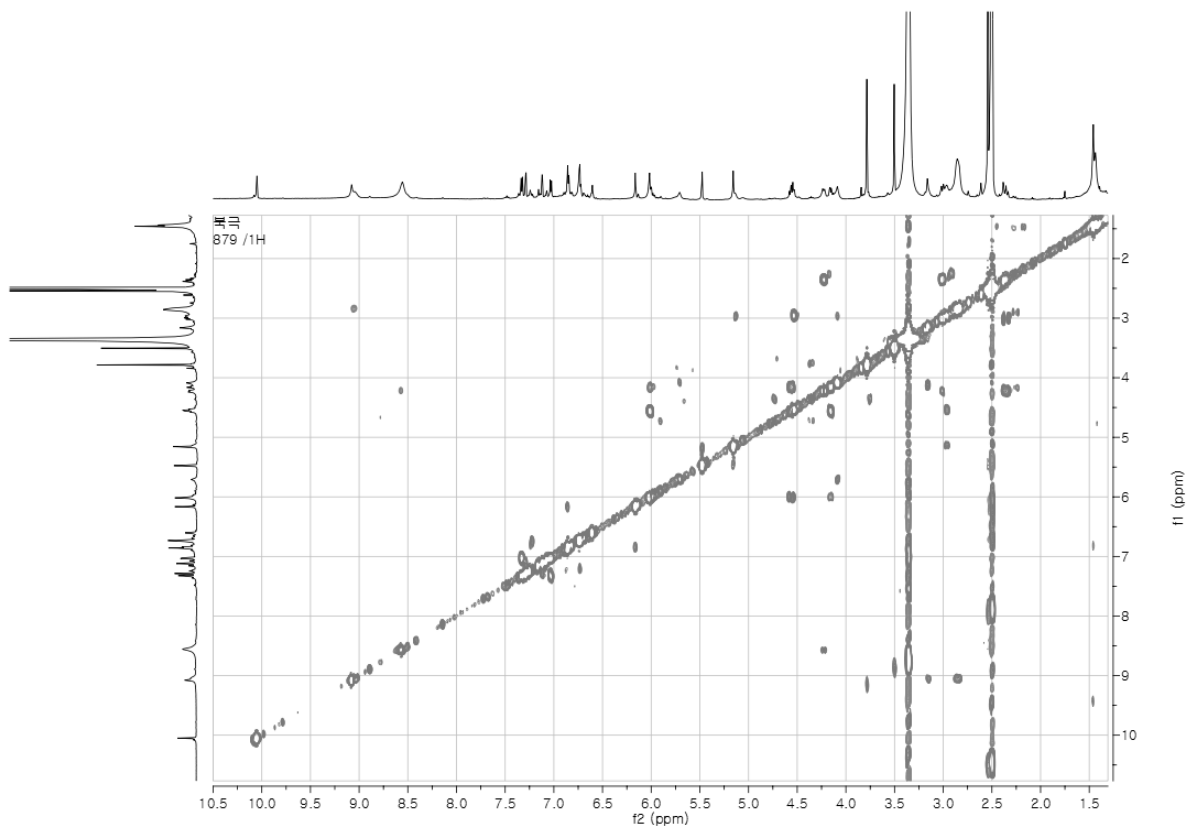

**Figure S11.** HSQC spectrum (600 MHz) of C-1027 Chr-V (2) in DMSO- $d_6$ .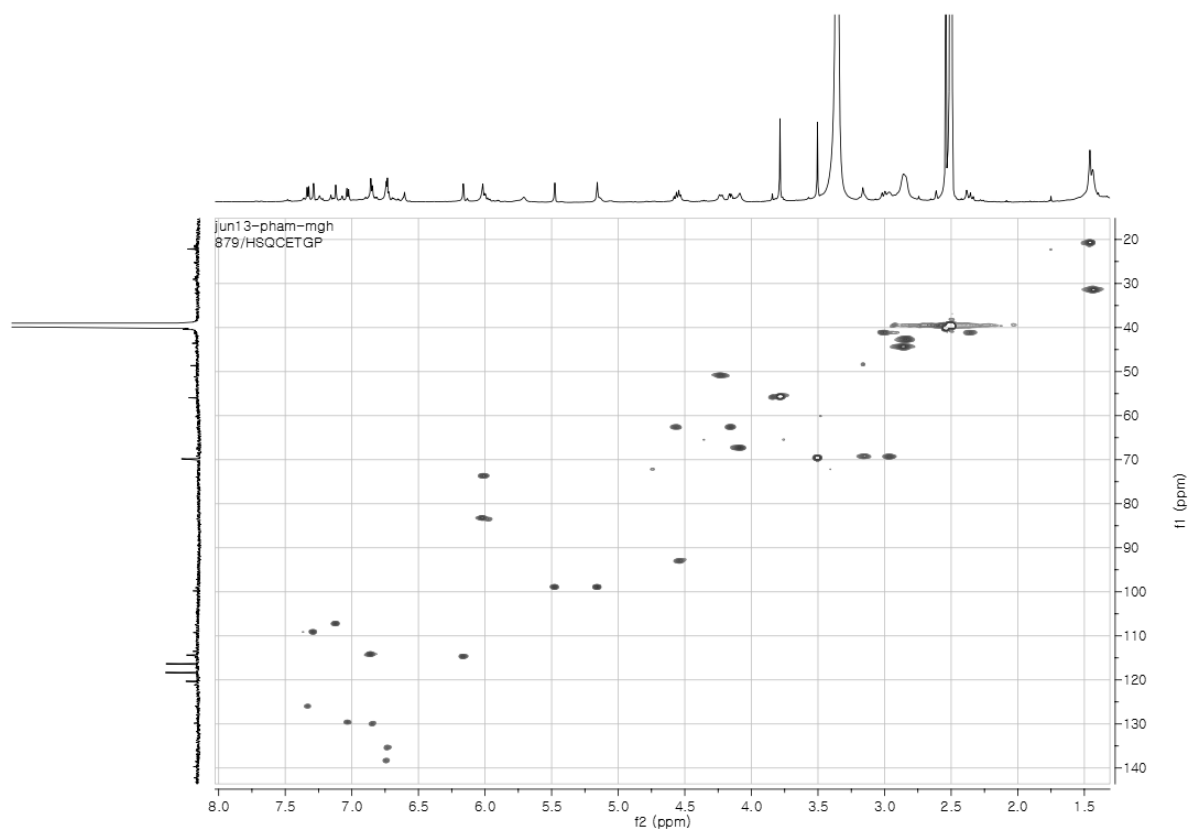**Figure S12.** HMBC spectrum (600 MHz) of C-1027 Chr-V (2) in DMSO- $d_6$ .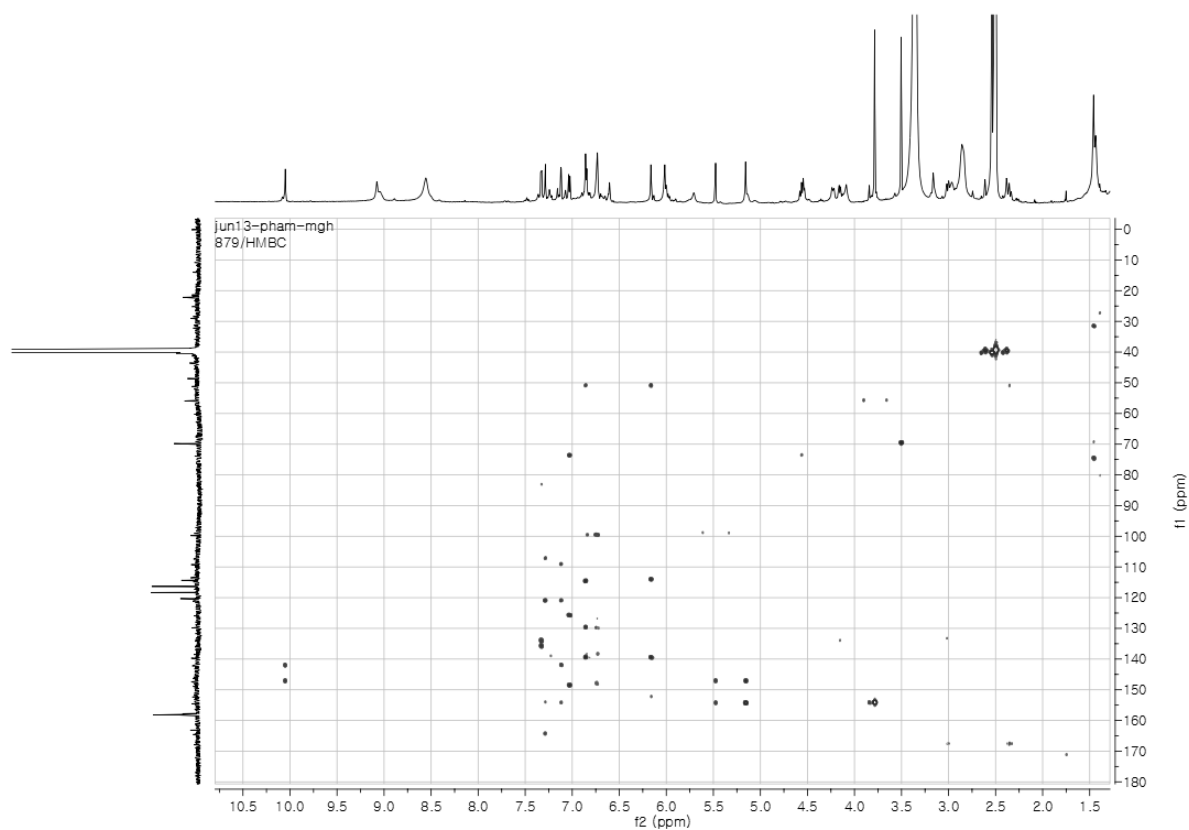

**Figure S13.** ROESY spectrum (600 MHz) of C-1027 Chr-V (2) in DMSO- $d_6$ .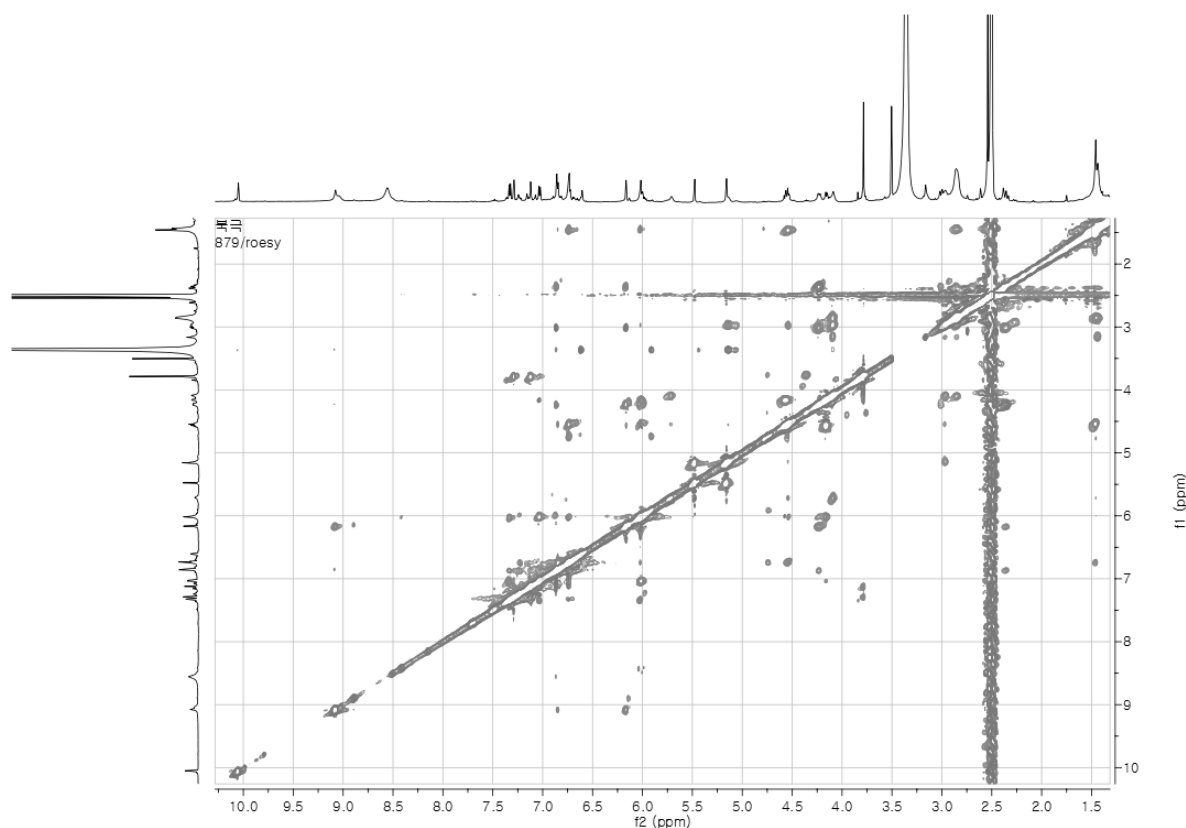**Figure S14.** 16S rDNA sequence data of *Streptomyces* sp. ART 5.

CGCCTGGGCGGCGTGCTTTACCATGCAGTCGAACGATGAAATCACTTCGGTGG  
 TGGATTAGTGGCGAACGGGTGAGTAACACGTGGGCAATCTGCCCTTCACTCTG  
 GGACAAGCCCTGGAAACGGGGTCTAATACCGGATACCACTCTGTCCCGCATGG  
 GACGGGGTTGAAAGCTCCGGCGGTGAAGGATGAGCCCGCGGCCTATCAGCTTG  
 TTGGTGGGGTAATGGCCTACCAAGGCGACGACGGGTAGCCGGCCTGAGAGGG  
 CGACCGGCCACACTGGGACTGAGACACGGCCCAGACTCCTACGGGAGGCAGC  
 AGTGGGGAATATTGCACAATGGGCGAAAGCCTGATGCAGCGACGCCGCGTGA  
 GGGATGACGGCCTTCGGGTGTAAACCTCTTTCAGCAGGGAAGAAGCGCAAGT  
 GACGGTACCTGCAGAAGAAGCGCCGGCTAACTACGTGCCAGCAGCCGCGGTA  
 ATACGTAGGGCGCAAGCGTTGTCCGGAATTATTGGGCGTAAAGAGCTCGTAGG  
 CGGCTTGTCACGTCGGATGTGAAAGCCCGGGGCTTAACCCCGGGTCTGCATTC  
 GATACGGGCTAGCTAGAGTGTGGTAGGGGAGATCGGAATTCCTGGTGTAGCGG  
 TGAAATGCGCAGATATCAGGAGGAACACCGGTGGCGAAGGCGGATCTCTGGG  
 CCATTACTGACGCTGAGGAGCGAAAGCGTGGGGAGCGAACAGGATTAGATAC  
 CCTGGTAGTCCACGCCGTAAACGTTGGGAACTAGGTGTTGGCGACATTCCACG  
 TCGTCGGTGCCGCAGCTAACGCATTAAGTTCCCCGCCTGGGGAGTACGGCCGC  
 AAGGCTAAAACTCAAAGGAATTGACGGGGGGCCCGCACAAGCAGCGGAGCATG  
 TGGCTTAATTTCGACGCAACGCGAAGAACCTTACCAAGGCTTGACATATACCGG  
 AAAGCATCAGAGATGGTGCCCCCCTTGTGGTCCGTATACAGGTGGTGCATGGC  
 TGTCGTCAGCTCGTGTCGTGAGATGTTGGGTAAAGTCCCGCA



**Figure S15.** (a) The GC chromatograms of the silylated arcticoside sugar. (b) Co-injection of the silylated D-glucose standard and the silylated arcticoside sugar. D-Glucose and the arcticoside sugar eluted at the same retention time. (c) Co-injection of the silylated L-glucose standard and the silylated arcticoside sugar. L-Glucose and the arcticoside sugar were separated.

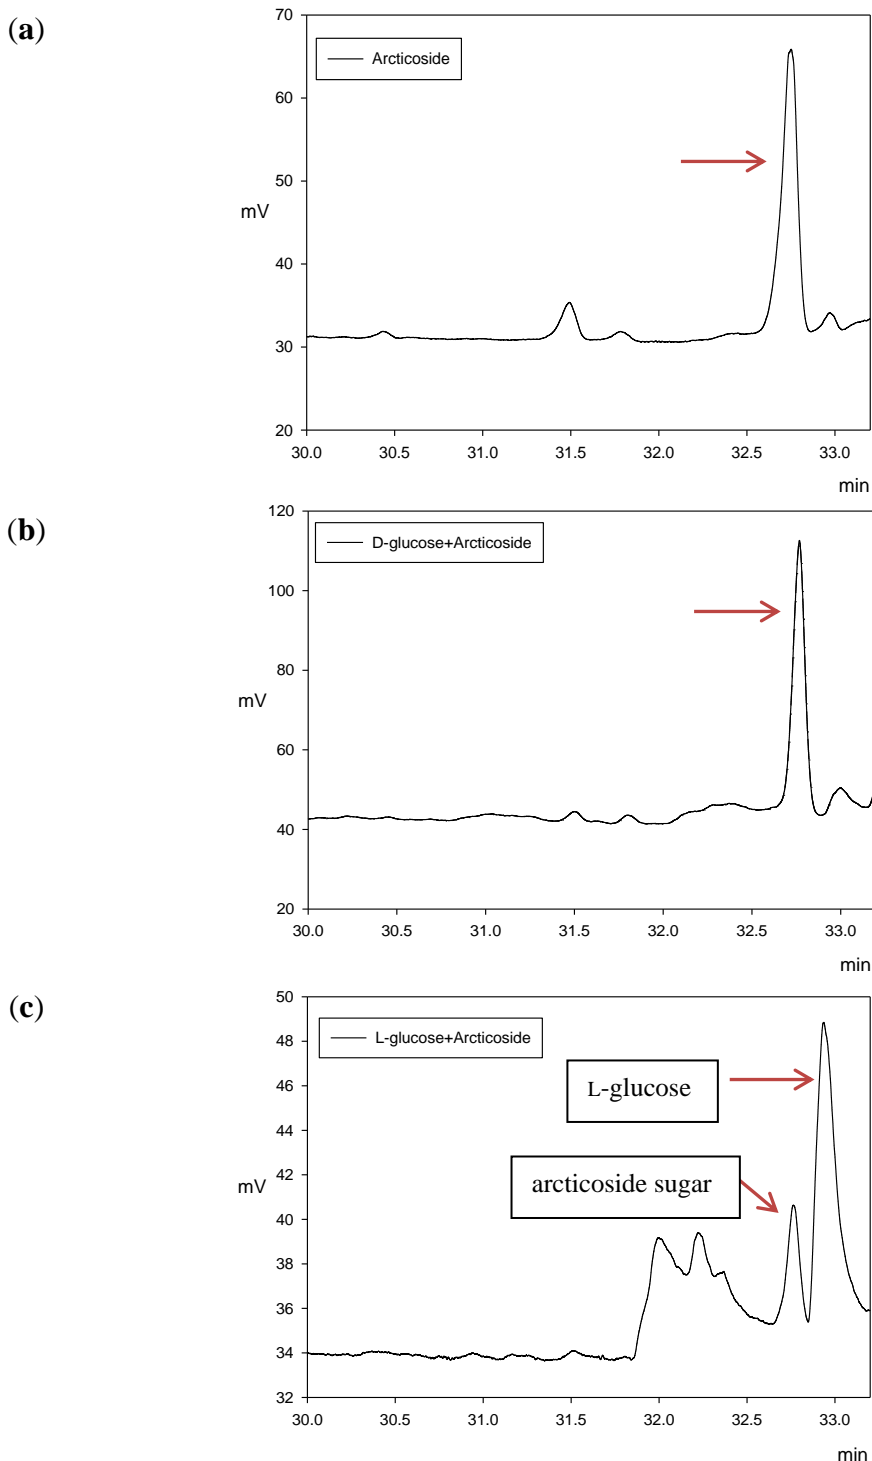

Supplement: s1 [file s1]
